# Supplementary material for: Radiation-Induced c-Jun Activation Depends on MEK1-ERK1/2 Signaling Pathway in Microglial Cells
Source: PubMed Central journal article supplement (PMC3351464; doi:10.1371/journal.pone.0036739), 2012-05-14

Figure S2

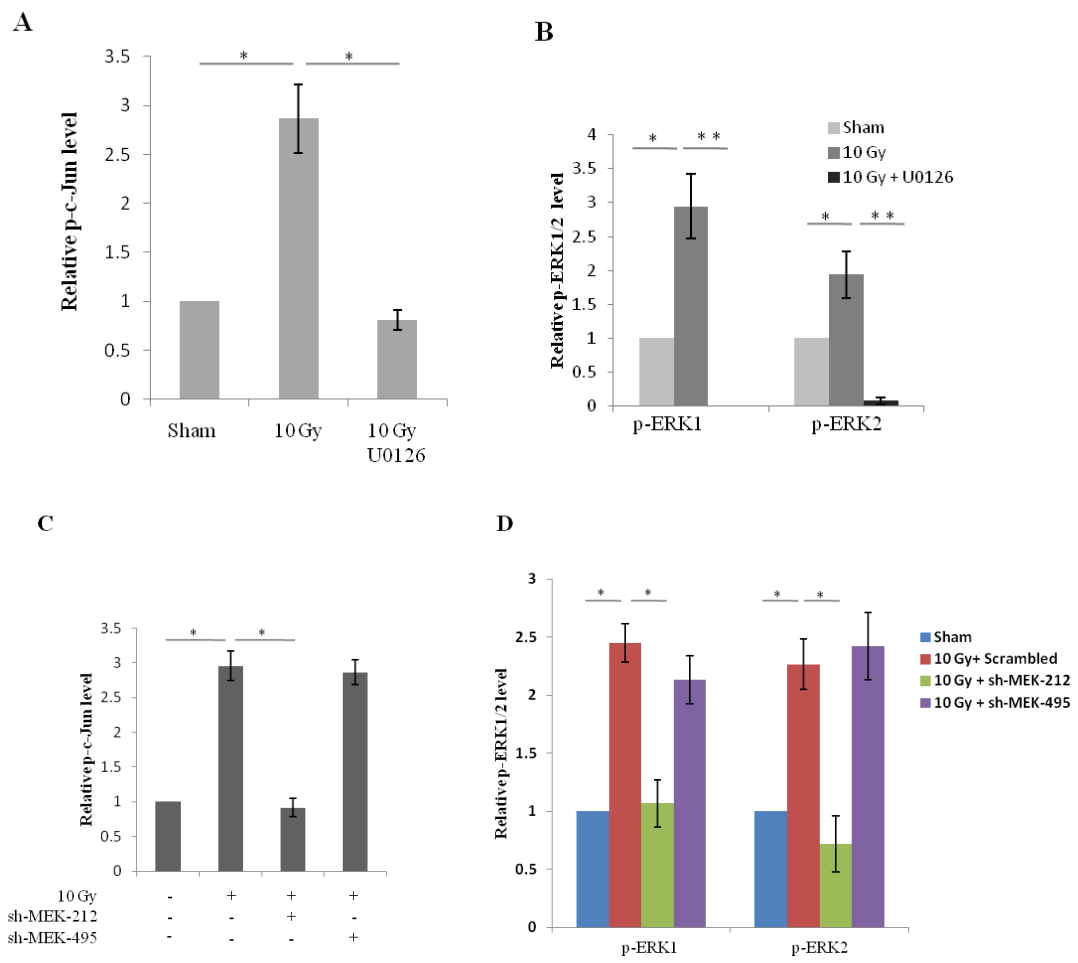

Supplement: pone.0036739.s002.pdf [file pone.0036739.s002.pdf]
